# Supplementary material for: Low level of HIV-1 evolution after transmission from mother to child
Source: PubMed Central journal article supplement — Sci Rep. 2014 May 28;4:5079. doi: 10.1038/srep05079 (PMC5381489; doi:10.1038/srep05079), 2014-05-28
Supplement: srep05079-s1.pdf [file srep05079-s1.pdf]

## **Low level of HIV-1 evolution after transmission from mother to child.**

Esther F. Gijsbers<sup>1</sup>, Ad C. van Nuenen<sup>1</sup>, Alba Torrents de la Peña<sup>1</sup>, Emma J. Bowles<sup>2</sup>,  
Guillaume B. Stewart-Jones<sup>2</sup>, Hanneke Schuitemaker<sup>1,3</sup> and Neeltje A. Kootstra<sup>1\*</sup>.

1. Department of Experimental Immunology, Sanquin Research, Landsteiner Laboratory, and Center for Infectious Diseases and Immunity Amsterdam (CINIMA), Academic Medical Center, University of Amsterdam, Amsterdam, the Netherlands.

2. Human Immunology Unit, Weatherall Institute of Molecular Medicine, John Radcliffe Hospital, University of Oxford, Oxford, United Kingdom.

3. Present address: Crucell Holland BV, Leiden, the Netherlands.

\* Corresponding author.

Correspondence should be addressed to:

N.A. Kootstra, PhD. Department of Experimental Immunology, Academic Medical Center, Meibergdreef 15, 1105 AZ Amsterdam, the Netherlands; Phone: +31 20 5668298; E-mail: [N.A.Kootstra@amc.uva.nl](mailto:N.A.Kootstra@amc.uva.nl).

Running title: HIV-1 evolution after mother-to-child transmission.

Supplementary information: supplementary figure 1, supplementary table 1.

**Legend to figure.**

**Supplementary Figure 1. Neighbor joining phylogenetic tree of *env* sequences isolated from mothers and children.**

Large symbols represent viral sequences obtained from mothers; small symbols represent viral sequences isolated from children.

● pair 102, ◻ pair 114, ○ pair 127, ■ pair 133, + pair 137.

Numbers represent bootstrap values in percentages.

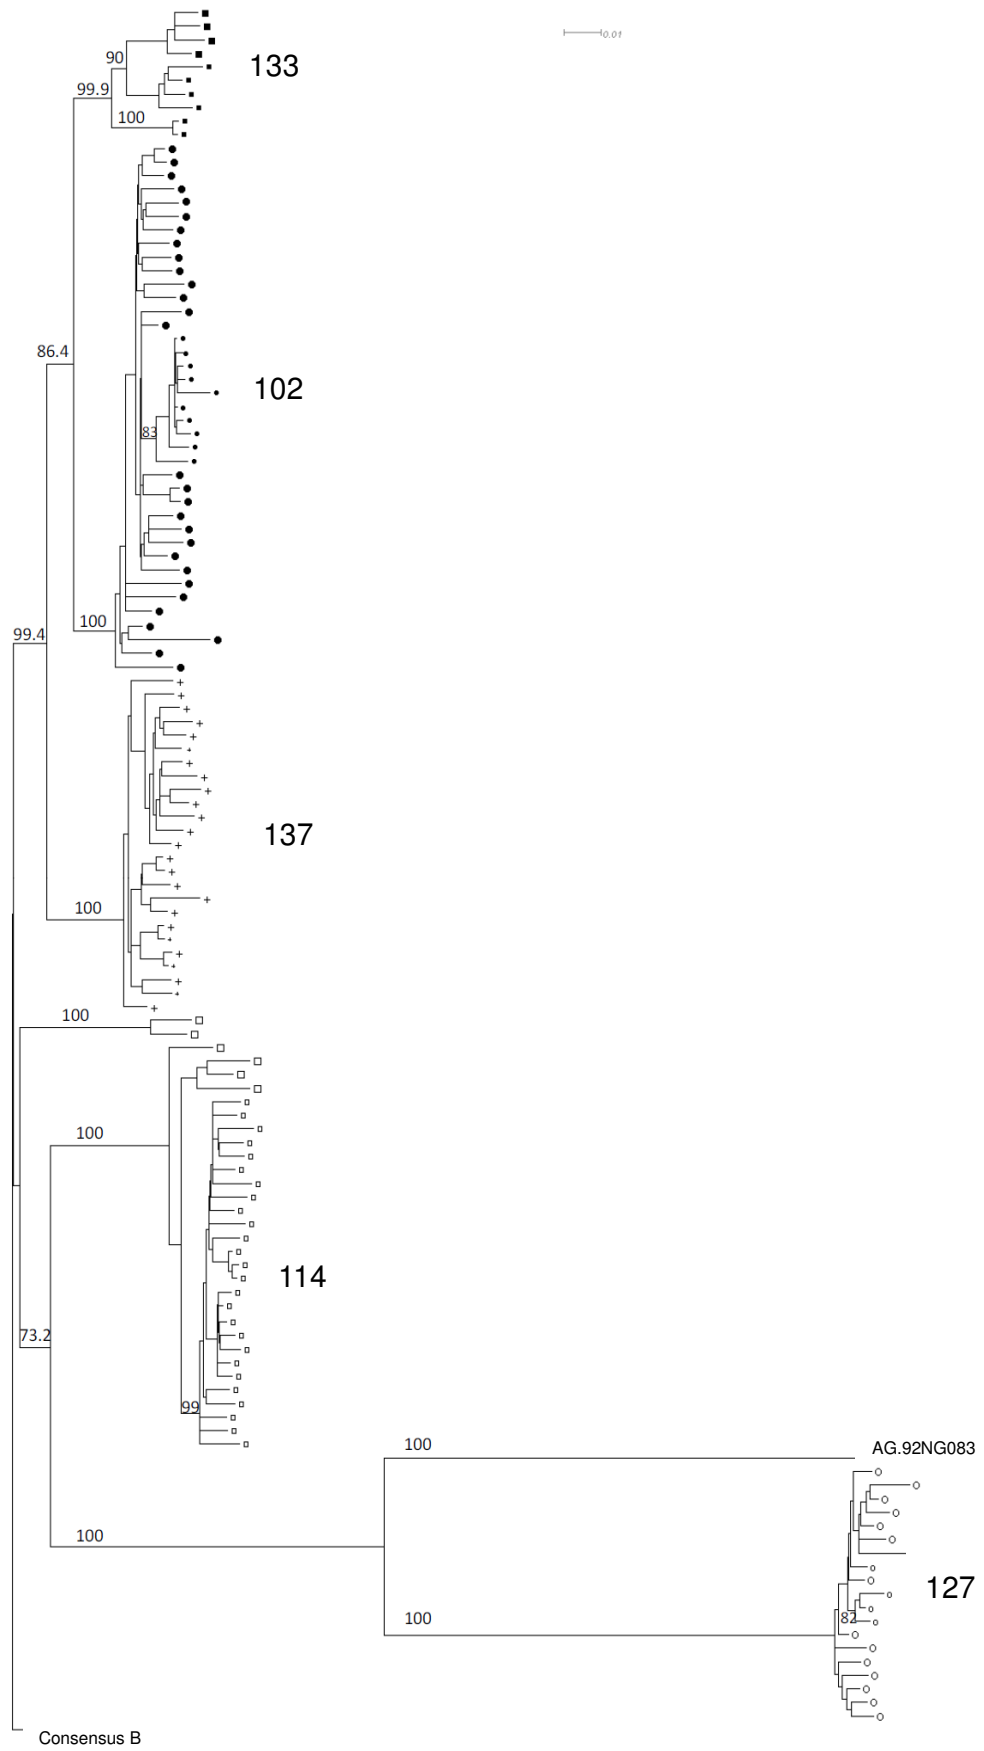

**Supplementary table 1.** The position and location within HLA-restricted CTL epitopes of forward mutations and reversion of transmitted mutations in Nef, Gag and Env in viral variants obtained from the children.

| Mother-child couple | HIV-1 protein | Mutation  | Type of mutation      | Number of sequences | CTL epitope | HLA allele |                |
|---------------------|---------------|-----------|-----------------------|---------------------|-------------|------------|----------------|
| 102                 | Nef           | M171T/V   | Forward, anchor       | 3 / 9<br>(2xT, 1xV) | G170 - V178 | A*0201     | shared, anchor |
|                     |               |           |                       |                     |             |            |                |
|                     | Env           | G17A      | Forward               | 9 / 10              | H12 - L20   | A*0201     | shared         |
|                     |               |           |                       |                     |             |            |                |
|                     |               |           |                       |                     |             |            |                |
|                     |               |           |                       |                     |             |            |                |
|                     |               |           |                       |                     |             |            |                |
|                     |               |           |                       |                     |             |            |                |
|                     |               |           |                       |                     |             |            |                |
|                     | V206I         | Forward   | 9 / 10                |                     |             | outside    |                |
|                     |               |           |                       |                     |             |            |                |
|                     | C759F/L       | Forward   | 10 / 10<br>(8xF, 2xL) | R756 - H764         | B*3701      | shared     |                |
|                     |               |           |                       |                     |             |            |                |
|                     | A774T         | Reversion | 10 / 10               | L769 - V777         | A*0201      | shared     |                |
|                     |               |           |                       | I772 - L780         | A*0206      | child      |                |
|                     |               |           |                       |                     | B*0702      | shared     |                |
|                     | A816V         | Forward   | 8 / 10                | S808 - V817         | A*0201      | shared     |                |
|                     |               |           |                       | A816 - V824         | A*0206      | child      |                |
| 114                 | Nef           | L199M/K   | Forward               | 6 / 9<br>(5xM, 1xK) | M195 - Y203 | B*3501     | shared         |
|                     |               |           |                       |                     | A196 - Y204 | B*3501     | shared         |

|         |                 |         |                   |         |                |        |                |         |
|---------|-----------------|---------|-------------------|---------|----------------|--------|----------------|---------|
| 114     | Gag             | D14Y    | Forward           | 4 / 15  | L13 - L21      | B*3501 | shared         |         |
|         |                 |         |                   |         | G11 - I19      | B*4501 | child          |         |
|         |                 | E312D   | Forward           | 15 / 15 |                |        | outside        |         |
|         |                 |         | S310T             | Forward | 4 / 11         |        |                | outside |
|         | Env             | N33K    | Reversion         | 10 / 10 | A30 - V38      | B*5101 | mother         |         |
|         |                 |         |                   |         | A31 - Y39      | B*4501 | child          |         |
|         |                 | N223D   | Forward           | 7 / 10  |                |        | outside        |         |
|         |                 | I287V   | Reversion, anchor | 9 / 10  | L282 - R290    | A*6601 | mother         |         |
|         |                 |         |                   |         | N279 - V287    | B*5101 | mother         |         |
|         |                 |         |                   |         | E286 - F294    | B*3501 | shared, anchor |         |
|         |                 | N341D   | Reversion         | 8 / 10  | D341 - I349    | A*2301 | shared         |         |
|         |                 |         |                   |         |                |        | child          |         |
|         |                 | D653E   | Reversion         | 8 / 10  | T650 - L658    | B*5101 | mother         |         |
|         |                 | I/T664L | Reversion         | 7 / 10  | E657 - I665    | A*2301 | shared         |         |
|         |                 |         |                   |         |                | child  |                |         |
|         |                 |         | I658 - Y666       | B*3501  | shared         |        |                |         |
| I/F863V | Forward, anchor | 7 / 10  | A862 - I870       | A*2301  | shared, anchor |        |                |         |
|         |                 |         |                   |         | child, anchor  |        |                |         |
|         |                 |         | V855 - I863       | B*3501  | shared, anchor |        |                |         |

|       |     |                   |                   |             |             |        |                |               |
|-------|-----|-------------------|-------------------|-------------|-------------|--------|----------------|---------------|
| 127   | Nef | S8R               | Reversion         | 2 / 5       | S8 - V16    | B*1516 | shared         |               |
|       |     | E62D              | Forward           | 4 / 5       | Q61 - F69   | B*4403 | child          |               |
|       |     | Y103H             | Forward           | 5 / 5       | L98 - K105  | A*7401 | shared         |               |
|       |     | K105Q             | Reversion, anchor | 3 / 5       | L98 - K105  | A*7401 | shared, anchor |               |
|       |     |                   |                   |             | I102 - I110 | A*2301 | mother         |               |
|       |     |                   | D177A             | Forward     | 2 / 5       |        |                | outside       |
|       | Gag | K43R              | Reversion         | 9 / 9       |             |        |                | outside       |
|       |     | Y79F              | Forward, anchor   | 9 / 9       | G71 - Y79   | A*0101 |                | child, anchor |
|       |     |                   |                   |             | G71 - Y79   | B*1516 |                | shared        |
|       |     |                   |                   |             | L78 - L85   | B*4403 |                | child         |
|       | Env | D187N             | Forward, anchor   | 2 / 4       | P185 - Y200 | A*0101 |                | child, anchor |
|       |     |                   |                   |             | P185 - Y200 | B*4403 |                | child         |
|       |     | Y334H             | Reversion, anchor | 3 / 4       | I326 - Y334 | B*4403 |                | child, anchor |
|       |     | K/V392A           | Forward           | 3 / 4       | T390 - V398 | B*1516 |                | shared        |
| E512G |     | Forward           | 3 / 4             |             |             |        | outside        |               |
| K593R |     | Forward           | 2 / 4             | V585 - K593 | A*7401      |        | shared         |               |
| V848I |     | Reversion, anchor | 3 / 4             | R840 - I848 | A*2301      |        | mother, anchor |               |
|       |     |                   |                   |             |             |        |                |               |
| 133   | Nef | S6R               | Reversion         | 2 / 5       |             |        | outside        |               |
|       |     | R20Q              | Forward           | 2 / 5       |             |        | outside        |               |

|       |     |         |                   |         |             |             |                |       |
|-------|-----|---------|-------------------|---------|-------------|-------------|----------------|-------|
| 133   | Nef | Y40H    | Reversion         | 5 / 5   |             |             | outside        |       |
|       |     | D64E    | Reversion         | 5 / 5   |             |             | outside        |       |
|       |     | K72R    | Reversion         | 5 / 5   | A*0301      | P70 - R78   | mother         |       |
|       |     |         |                   |         | B*0702      | F69 - L77   | mother         |       |
|       |     |         | R189H             | Forward | 5 / 5       | A*0201      | V181 - L190    | child |
|       | Gag | Q28K    | Reversion, anchor | 6 / 6   | A*0301      | R20 - K28   | mother, anchor |       |
|       |     |         |                   |         | B*2705      | L21 - Y29   | child          |       |
|       |     | K30R    | Forward           | 6 / 6   |             |             | outside        |       |
|       |     | E55K    | Forward           | 6 / 6   |             |             | outside        |       |
|       |     | M61I    | Forward, anchor   | 6 / 6   | A*0201      | I60 - L 68  | child, anchor  |       |
|       |     | G62E    | Forward           | 6 / 6   | A*0201      | I60 - L 68  | child          |       |
|       |     | A67S    | Reversion         | 5 / 6   | A*0201      | I60 - L 68  | child          |       |
|       |     | S173A   | Forward           | 5 / 6   |             |             | outside        |       |
|       |     | R264K   | Forward, anchor   | 6 / 6   | B*2705      | K263 - K272 | child, anchor  |       |
|       |     | L268M   | Forward           | 6 / 6   | B*2705      | K263 - K272 | child          |       |
|       |     | S373P   | Forward           | 3 / 6   |             |             | outside        |       |
| R379K |     | Forward | 2 / 6             | B*4402  | T374 - F382 | shared      |                |       |
|       |     |         |                   | B*2705  | Q378 - R388 | child       |                |       |

|     |     |             |                   |            |        |             |               |
|-----|-----|-------------|-------------------|------------|--------|-------------|---------------|
| 133 | Env | M19V        | Forward           | 3 / 4      | A*0201 | H12 - L20   | child         |
|     |     | Y27C        | Reversion         | 4 / 4      | A*0301 | L24 - K32   | mother        |
|     |     | V83I        | Forward           | 4 / 4      |        |             | outside       |
|     |     | K86A/T      | Forward           | 4 / 4      | B*4402 | V84 - F92   | shared        |
|     |     |             |                   | (3xA, 1xT) |        |             |               |
|     |     | K89T        | Reversion         | 4 / 4      | A*0301 | V84 - F92   | mother        |
|     |     |             |                   |            | B*4402 | V84 - F92   | shared        |
|     |     | D132E       | Forward           | 4 / 4      |        |             | outside       |
|     |     | E148G       | Forward           | 4 / 4      |        |             | outside       |
|     |     | Q167K       | Forward           | 4 / 4      | A*0101 | I162 - Y170 | shared        |
|     |     |             |                   |            | B*2705 | I162 - Y170 | child         |
|     |     | D169E       | Reversion         | 4 / 4      | A*0101 | I162 - Y170 | shared        |
|     |     |             |                   |            | B*2705 | I162 - Y170 | child         |
|     |     |             |                   |            | B*0702 | K165 - F173 | mother        |
|     |     | I179V       | Reversion, anchor | 4 / 4      | A*0201 | A171 - V179 | child, anchor |
|     |     | R182G       | Forward           | 4 / 4      |        |             | outside       |
|     |     | S185N       | Reversion         | 4 / 4      |        |             | outside       |
|     |     | N188 - S194 | Insert            | 4 / 4      |        |             | insert        |



|     |     |             |                   |       |        |             |               |
|-----|-----|-------------|-------------------|-------|--------|-------------|---------------|
| 133 | Env | T233N       | Reversion         | 4 / 4 | A*0301 | I229 - F237 | mother        |
|     |     |             |                   |       | B*4402 | I229 - F237 | shared        |
|     |     | K235Q       | Forward           | 4 / 4 | B*4402 | I229 - F237 | shared        |
|     |     | N283D       | Reversion         | 4 / 4 |        |             | outside       |
|     |     | L336I       | Reversion         | 3 / 4 |        |             | outside       |
|     |     | A374V       | Reversion         | 4 / 4 | B*0702 | D370 - F378 | mother        |
|     |     | T377S       | Reversion         | 4 / 4 | A*0301 | H376 - F384 | mother        |
|     |     |             |                   |       | B*0702 | D370 - F378 | mother        |
|     |     | S395 - N400 | Insert            | 4 / 4 |        |             | insert        |
|     |     | D405G       | Reversion         | 3 / 4 |        |             | outside       |
|     |     | T406I       | Forward           | 3 / 4 |        |             | outside       |
|     |     | N415S       | Forward           | 3 / 4 |        |             | outside       |
|     |     | V427I       | Reversion, anchor | 4 / 4 | A*0201 | I419 - V427 | child, anchor |
|     |     |             |                   |       | B*2705 | C422 - M430 | child         |
|     |     | T464N       | Reversion         | 4 / 4 |        |             | outside       |
|     |     | L548Q       | Reversion         | 4 / 4 | A*0201 | T541 - L549 | child         |
|     |     | L726P       | Forward           | 3 / 4 |        |             | outside       |
|     |     | E744G       | Forward           | 4 / 4 | B*2705 | E744 - R752 | child         |

|       |                 |       |                 |             |               |               |        |
|-------|-----------------|-------|-----------------|-------------|---------------|---------------|--------|
| 133   | Env             | T752P | Forward         | 4 / 4       | B*2705        | E744 - R752   | child  |
|       |                 |       |                 |             | A*0201        | R752 - L760   | child  |
|       |                 | A754V | Reversion       | 4 / 4       | A*0201        | R752 - L760   | child  |
|       |                 | N755D | Reversion       | 4 / 4       | A*0201        | R752 - L760   | child  |
|       |                 | I763V | Forward, anchor | 4 / 4       | A*0201        | R752 - L760   | child  |
|       |                 |       |                 |             | B*4402        | I/V764 - F771 | shared |
|       |                 | L782I | Reversion       | 4 / 4       | A*0301        | R775 - R785   | mother |
|       |                 |       |                 |             | B*0702        | I/L782 - L790 | mother |
|       |                 |       |                 |             | A*0201        | L779 - V787   | child  |
|       |                 |       |                 |             | B*2705        | H774 - I/L782 | child  |
|       |                 | E796G | Forward         | 3 / 4       | A*0101        | R792 - Y800   | shared |
|       |                 |       |                 |             | A*0201        | L789 - V797   | child  |
|       |                 |       |                 |             | B*2705        | G791 - Y800   | child  |
|       |                 | N803S | Forward         | 3 / 4       | A*0201        | V797 - L805   | child  |
|       |                 | F845L | Reversion       | 4 / 4       | A*0301        | L845 - R853   | mother |
|       |                 |       |                 |             | B*2705        | C842 - R850   | child  |
| L846I | Forward         | 4 / 4 | B*2705          | C842 - R850 | child         |               |        |
| R850V | Forward, anchor | 4 / 4 | B*2705          | C842 - R850 | child, anchor |               |        |

|       |         |       |                 |             |        |               |                  |
|-------|---------|-------|-----------------|-------------|--------|---------------|------------------|
| 133   | Env     | F856L | Reversion       | 4 / 4       | B*0702 | I848 - L/F856 | mother           |
|       |         |       |                 |             | B*2705 | R850 - R858   | child            |
|       |         |       |                 |             | B*2705 | I852 - L860   | child            |
| 137   | Nef     | T101I | Reversion       | 3 / 5       |        |               | outside          |
|       |         | K105R | Forward         | 2 / 5       |        |               | outside          |
|       |         | H192R | Forward, anchor | 3 / 4       | B*0801 | A190 - L198   | child, anchor    |
|       | Gag     | S126N | Forward         | 6 / 6       |        |               | outside          |
|       |         | K286R | Reversion       | 6 / 6       |        |               | outside          |
|       | Env     | L20W  | Forward, anchor | 2 / 3       | A*0201 | H12 - L27     | shared, anchor   |
|       |         | V71A  | Forward         | 2 / 3       |        |               | outside          |
|       |         | N204T | Reversion       | 3 / 3       |        |               | outside          |
|       |         | N210S | Reversion       | 2 / 3       | A*0201 | R206 - V215   | mother<br>shared |
|       |         | V223I | Forward         | 2 / 3       |        |               | outside          |
| F330L | Forward | 2 / 3 | A*0201          | R324 - I333 | shared |               |                  |
